# Supplementary material for: Increased nuclear DNA damage precedes mitochondrial dysfunction in peripheral blood mononuclear cells from Huntington’s disease patients
Source: PubMed Central journal article supplement (PMC6026140; doi:10.1038/s41598-018-27985-y), 2018-06-29
Supplement: 41598_2018_27985_MOESM1_ESM.pdf [file 41598_2018_27985_MOESM1_ESM.pdf]

# **Increased nuclear DNA damage precedes mitochondrial dysfunction in peripheral blood mononuclear cells from Huntington's disease patients**

<sup>1,2</sup>Georgina Askeland, <sup>3</sup>Zaneta Dosoudilova, <sup>3</sup>Marie Rodinova, <sup>4</sup>Jiri Klempir, <sup>4</sup>Irena Liskova, <sup>5</sup>Anna Kuśnierczyk, <sup>2,5</sup>Magnar Bjørås, <sup>2</sup>Gaute Nesse, <sup>2</sup>Arne Klungland, <sup>3</sup>Hana Hansikova, <sup>1</sup>Lars Eide\*

<sup>1</sup>Department of Medical Biochemistry, Institute of Clinical Medicine, University of Oslo; <sup>2</sup>Department of Microbiology, Oslo University Hospital; <sup>3</sup>Department of Pediatrics and Adolescent Medicine and <sup>4</sup>Department of Neurology and Centre of Clinical Neuroscience, First Faculty of Medicine, Charles University in Prague and General University Hospital in Prague, Czech Republic; <sup>5</sup>Proteomics and Metabolomics Core Facility, PROMEC, Department of Clinical and Molecular Medicine, Norwegian University of Science and Technology, Trondheim

## **Supplementary information**

Supplementary Table S1  
Supplementary Table S2  
Supplementary Table S3  
Supplementary Figure S1

**Supplementary Table S1.**  
Gene ontology analyses

| Description                  | GO accession | <40  |           |       | 40-50 |            |       | >50  |           |       |
|------------------------------|--------------|------|-----------|-------|-------|------------|-------|------|-----------|-------|
|                              |              | Rank | P-value   | DEG's | Rank  | P-value    | DEG's | Rank | P-value   | DEG's |
| electron transport chain     | GO:0022900   | 529  | 0.012407  | 16    | 172   | 0.00045731 | 14    | 62   | 0.0055547 | 12    |
| mitochondrial membrane       | GO:0031966   | 405  | 0.0059333 | 52    | 485   | 0.025069   | 29    | 118  | 0.037167  | 27    |
| oxidative phosphorylation    | GO:0006119   | 1202 | 0.13238   | 10    | 287   | 0.0036619  | 10    | 92   | 0.017259  | 9     |
| response to hypoxia          | GO:0001666   | 525  | 0.012109  | 27    | 403   | 0.01484    | 16    | 221  | 0.15514   | 13    |
| response to oxidative stress | GO:0006979   | 386  | 0.0046547 | 35    | 68    | 1.0363e-06 | 29    | 33   | 0.0012887 | 22    |

RNA sequencing of HD grouped according to CAG size unravels that oxidative stress response genes, mitochondrial genes and hypoxia response genes being affected in a CAG-dependent manner. RNA from PBMC were pooled into low-CAG (<40), mid-CAG (40-50) and high-CAG (>50) category..

**Supplementary Table S2.**

Correlation analyses

|                | <b>CS_act</b>           | <b>cl_act</b>          | <b>cll_act</b>          |
|----------------|-------------------------|------------------------|-------------------------|
| <b>cIV_act</b> | <b>0,78**</b><br>0,70** | <b>0,699**</b><br>n.s. | <b>0,76**</b><br>0,80** |
| <b>CS_act</b>  |                         | <b>0,66**</b><br>n.s.  | <b>0,88**</b><br>0,78** |
| <b>cl_act</b>  |                         |                        | <b>0,59**</b><br>n.s.   |

Activities of citrate synthase (CS\_act), complex I (cl\_act; NQR), complex II (cll\_act; SQR), complex IV (cIV\_act; COX) were subjected to Pearson correlation analyses. The table gives the resulting R values for controls (black font; n=34), and HD (grey font; n=17). \*\*p < 0.002; n.s. : non-significant.

### Supplementary Table S3.

#### Primer sequences

| Loci           | Forward                        | Reverse                        | Purpose                                |
|----------------|--------------------------------|--------------------------------|----------------------------------------|
| <i>CYCS</i>    | CATGGCCCCTCCCATCTACA           | ATCTTGAGCCCCATGCGTTT           | Gene expression                        |
| <i>D-LOOP</i>  | CACCATCCTCCGTGAAATCAA          | CCCGGAGCGAGGAGAGTAG            | Gene expression                        |
| <i>DRP1</i>    | ACTGGAATTGTACCCGGAG            | CTGCTTCCACCCCATTTTCTTC         | Gene expression                        |
| <i>FEN1</i>    | CCAAAGGCCAGTCATCCCTC           | GCATCAATGGCCACCTTACG           | Gene expression                        |
| <i>HBB</i>     | GAAGAGCCAAGGACAGGTAC           | CAACTTCATCCACGTTACC            | Copy number                            |
| <i>HTT</i>     | ATGAAGGCCTTCGAGTCCCTCAAGTCCTTC | CGGCGGGCGGTGGCGTTGCTGTTGCTGCTG | CAG sizing                             |
| <i>MT-CYB</i>  | ACCCCCTAGGAATCACCTCC           | GCCTAGGAGGTCTGGTGAGA           | Gene expression                        |
| <i>MT-ND2</i>  | GCCCTAGAAATAAACATGCTA          | GGGCTATTCTAGTTTTATT            | Gene expression                        |
| <i>MT-ND6</i>  | CAACCAGTAACTACTACTAA           | ACTTTAATAGTGTAGGAAGC           | Gene expression                        |
| <i>MT-RNR1</i> | AAACTGCTCGCCAGAACACT           | CATGGGCTACACCTTGACCT           | DNA damage/gene expression/copy number |
| <i>NDUFA9</i>  | ATTCCCCTTGCCGCTTTTTG           | ATGTGCATCCGCTCCACTTT           | Gene expression                        |
| <i>NDUFA9</i>  | GCAAGGGTCCCTATGAGAGAA          | CAAGAACGAGGGGAAAAGTG           | DNA damage                             |
| <i>NEIL1</i>   | GCTGACCCCTGAGCCAGAAGAT         | CCCCAACTGGACCACTTCT            | Gene expression                        |
| <i>NEIL2</i>   | ACCTGTGACATCCTGTCTGAGAAGT      | TAATGATGTTCCCTAGCCCTGAGA       | Gene expression                        |
| <i>NEIL3</i>   | GGTCTCCACCCAGCTGTAAAG          | CACGTATCATTTCATGAGGTGATG       | Gene expression                        |
| <i>OGG1</i>    | CGAGCCATCCTGGAAGAACAG          | ACATATGGACATCCACGGGCAC         | Gene expression                        |
| <i>SIRT1</i>   | GGAGGATAGACCTCACATGC           | TATGGACCTATCCGTGGCCT           | Gene expression                        |
| <i>SOD1</i>    | CTGTACCAGTGCAAGTCTCTC          | CCAAGTCTCCAACATGCCTCT          | Gene expression                        |
| <i>SOD2</i>    | GACAAACCTCAGCCCTAACG           | GAAACCAAGCCAACCCCAAC           | Gene expression                        |
| <i>UCP2</i>    | CCTCTCCAATGTTGCTCGT            | GGCAAGGGAGGTCATCTGTC           | Gene expression                        |

Table shows sequences of primers used for various experiential methods as indicated in right column.

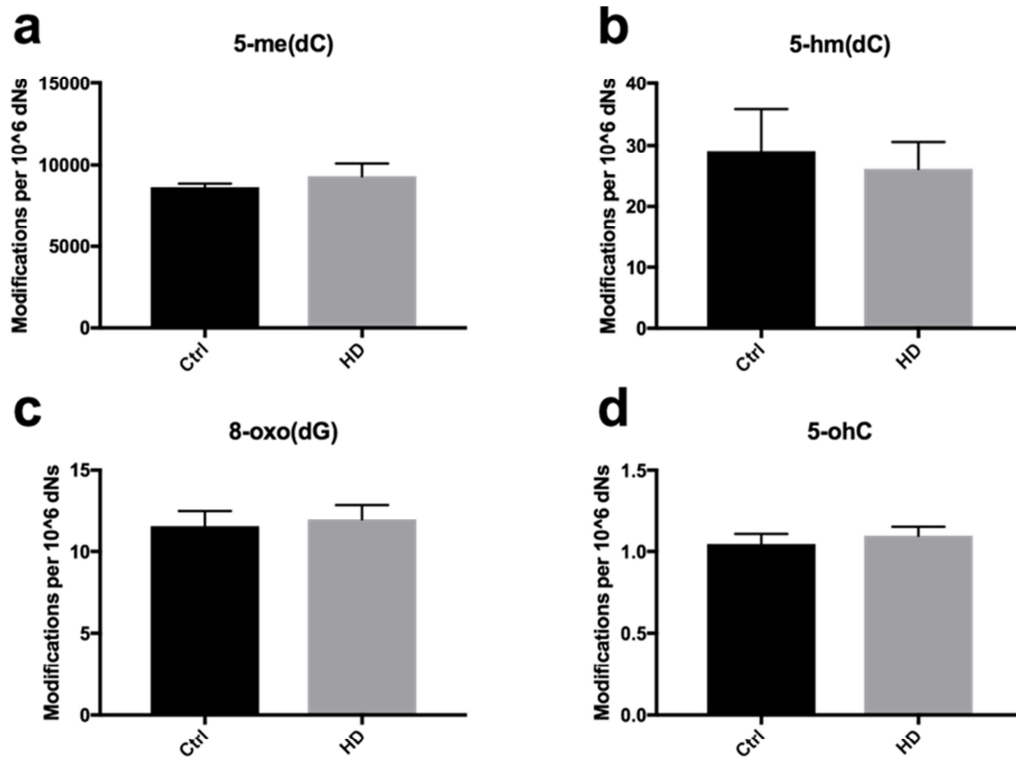

### Supplementary Figure S1

#### Mass spectrometry analysis of DNA base modifications in Ctrl and HD lymphocytes

The levels of DNA base modifications were determined by LC-MS/MS

Frequency of the following base modifications are provided as frequency per million nt in total DNA: (a) Levels of methylcytosine (5-me(dC)); (b) Levels of 5-hydroxymethylcytosine (5-hm(dC)); (c) Levels of 8-oxoguanine (8-oxo(dG)); (d) Levels of 5-hydroxymethylcytosine (5-ohC).
